# Supplementary material
Source: PubMed Central journal article supplement (PMC8240008)
Supplement: jamapediatr-e211832-s001.pdf [file jamapediatr-e211832-s001.pdf]

## Supplementary Online Content

Renny MH, Yin HS, Jent V, Hadland SE, Cerdá M. Temporal trends in opioid prescribing practices in children, adolescents, and younger adults in the US from 2006 to 2018. *JAMA Pediatr*. Published online June 28, 2021.

doi:10.1001/jamapediatrics.2021.1832

**eTable 1.** Annual Opioid Prescribing Practices, 2006-2018, Stratified by Age Groups

**eTable 2.** Patients < 25 Years Old Dispensed One Versus Multiple Opioid Prescriptions, by Year, 2006-2018

**eTable 3.** Sensitivity Analysis Removing Oncology, Hematology, and Hospice Prescriber Subspecialties

**eTable 4.** Sensitivity Analysis Removing Long-Duration and High-Dosage Prescriptions

This supplementary material has been provided by the authors to give readers additional information about their work.

**eTable 1. Annual Opioid Prescribing Practices, 2006-2018, stratified by age groups**

| Year                | Total Opioid Prescriptions | Amount of Opioid Dispensed <sup>a</sup> | Prescription Duration |             |              | High-dosage Prescription, % <sup>b</sup> | ER/LA Formulation Prescription, % <sup>c</sup> |
|---------------------|----------------------------|-----------------------------------------|-----------------------|-------------|--------------|------------------------------------------|------------------------------------------------|
|                     |                            |                                         | (Mean [Median], days) | ≤ 3 days, % | ≥ 30 days, % |                                          |                                                |
| <b>2006 (total)</b> | 14773325                   |                                         | 6.08                  | 46.55       | 4.97         | 6.58                                     | 1.48                                           |
|                     |                            |                                         | 5                     | n=6876795   | n=733987     | n=972821                                 | n=21906                                        |
| 0-5 yrs             | 946722                     | 1.39                                    | 8.12                  | 27.72       | 7.28         | 15.45                                    | 1.79                                           |
|                     |                            |                                         | 5                     |             |              |                                          |                                                |
| 6-9 yrs             | 849948                     | 0.95                                    | 7.27                  | 34.74       | 6.66         | 7.04                                     | 1.58                                           |
|                     |                            |                                         | 5                     |             |              |                                          |                                                |
| 10-14 yrs           | 1370929                    | 0.74                                    | 5.91                  | 47.33       | 4.74         | 2.69                                     | 1.22                                           |
|                     |                            |                                         | 4                     |             |              |                                          |                                                |
| 15-19 yrs           | 4311719                    | 41.21                                   | 5.11                  | 51.53       | 2.98         | 5.32                                     | 1.02                                           |
|                     |                            |                                         | 3                     |             |              |                                          |                                                |
| 20-24 yrs           | 7294007                    | 44.30                                   | 6.28                  | 47.28       | 5.69         | 6.86                                     | 1.76                                           |
|                     |                            |                                         | 4                     |             |              |                                          |                                                |
| <b>2007 (total)</b> | 15689779                   |                                         | 6.38                  | 44.97       | 5.72         | 6.48                                     | 1.92                                           |
|                     |                            |                                         | 4                     | n=7055536   | n=897312     | n=1016135                                | n=302552                                       |
| 0-5 yrs             | 935126                     | 1.40                                    | 8.26                  | 26.61       | 7.56         | 14.63                                    | 2.01                                           |
|                     |                            |                                         | 5                     |             |              |                                          |                                                |
| 6-9 yrs             | 902452                     | 1.00                                    | 7.69                  | 39.94       | 7.66         | 7.22                                     | 2.01                                           |
|                     |                            |                                         | 5                     |             |              |                                          |                                                |
| 10-14 yrs           | 1418546                    | 0.75                                    | 6.16                  | 45.72       | 5.31         | 2.64                                     | 1.57                                           |
|                     |                            |                                         | 4                     |             |              |                                          |                                                |
| 15-19 yrs           | 4618779                    | 40.92                                   | 5.28                  | 50.02       | 3.33         | 5.12                                     | 1.29                                           |
|                     |                            |                                         | 3                     |             |              |                                          |                                                |

|                     |          |       |      |           |           |          |          |
|---------------------|----------|-------|------|-----------|-----------|----------|----------|
| 20-24 yrs           | 7814876  | 44.13 | 6.70 | 45.44     | 6.76      | 6.91     | 2.35     |
|                     |          |       | 4    |           |           |          |          |
| <b>2008 (total)</b> | 15576197 |       | 6.51 | 43.98     | 5.98      | 6.17     | 2.12     |
|                     |          |       | 4    | n=6857032 | n=931937  | n=960634 | n=329696 |
| 0-5 yrs             | 881277   | 1.30  | 8.14 | 25.89     | 7.09      | 12.99    | 1.99     |
|                     |          |       | 5    |           |           |          |          |
| 6-9 yrs             | 848684   | 0.94  | 7.56 | 32.37     | 7.23      | 6.22     | 2.11     |
|                     |          |       | 5    |           |           |          |          |
| 10-14 yrs           | 1365832  | 0.73  | 6.08 | 44.85     | 5.05      | 2.44     | 1.59     |
|                     |          |       | 4    |           |           |          |          |
| 15-19 yrs           | 4609396  | 40.52 | 5.34 | 49.10     | 3.40      | 4.84     | 1.40     |
|                     |          |       | 4    |           |           |          |          |
| 20-24 yrs           | 7871008  | 44.09 | 6.96 | 44.11     | 7.40      | 6.82     | 2.64     |
|                     |          |       | 4    |           |           |          |          |
| <b>2009 (total)</b> | 15455285 |       | 6.64 | 43.60     | 6.36      | 6.13     | 2.20     |
|                     |          |       | 4    | n=6738643 | n=983492  | n=947591 | n=339327 |
| 0-5 yrs             | 853973   | 1.33  | 8.25 | 25.65     | 7.01      | 12.36    | 2.00     |
|                     |          |       | 5    |           |           |          |          |
| 6-9 yrs             | 817713   | 0.91  | 7.54 | 32.09     | 6.78      | 5.25     | 2.00     |
|                     |          |       | 5    |           |           |          |          |
| 10-14 yrs           | 1346799  | 0.72  | 6.11 | 44.46     | 4.90      | 2.30     | 1.58     |
|                     |          |       | 4    |           |           |          |          |
| 15-19 yrs           | 4567951  | 40.08 | 5.36 | 48.78     | 3.41      | 4.70     | 1.45     |
|                     |          |       | 4    |           |           |          |          |
| 20-24 yrs           | 7868849  | 44.31 | 7.21 | 43.59     | 8.21      | 7.03     | 2.78     |
|                     |          |       | 4    |           |           |          |          |
| <b>2010 (total)</b> | 14702258 |       | 6.83 | 42.81     | 6.82      | 6.27     | 2.04     |
|                     |          |       | 4    | n=6294375 | n=1003263 | n=922387 | n=299482 |

|                     |          |       |      |           |           |          |          |
|---------------------|----------|-------|------|-----------|-----------|----------|----------|
| 0-5 yrs             | 837968   | 1.34  | 8.51 | 24.93     | 7.49      | 12.38    | 20.5     |
|                     |          |       | 5    |           |           |          |          |
| 6-9 yrs             | 771093   | 0.87  | 7.66 | 31.47     | 6.78      | 4.81     | 1.81     |
|                     |          |       | 5    |           |           |          |          |
| 10-14 yrs           | 1315686  | 0.72  | 6.58 | 42.26     | 5.86      | 2.37     | 1.64     |
|                     |          |       | 4    |           |           |          |          |
| 15-19 yrs           | 4259631  | 39.64 | 5.40 | 48.05     | 3.45      | 4.58     | 1.30     |
|                     |          |       | 3    |           |           |          |          |
| 20-24 yrs           | 7517880  | 44.97 | 7.42 | 43.10     | 8.34      | 7.39     | 2.55     |
| <b>2011 (total)</b> | 14581087 |       | 6.90 | 42.67     | 7.04      | 6.13     | 2.06     |
|                     |          |       | 4    | n=6222040 | n=1027113 | n=893268 | n=300578 |
| 0-5 yrs             | 813033   | 1.32  | 8.62 | 24.62     | 7.91      | 12.35    | 2.08     |
|                     |          |       | 6    |           |           |          |          |
| 6-9 yrs             | 741615   | 0.82  | 7.38 | 31.33     | 6.13      | 4.27     | 1.60     |
|                     |          |       | 5    |           |           |          |          |
| 10-14 yrs           | 1313135  | 0.71  | 6.84 | 41.37     | 6.45      | 2.38     | 1.78     |
|                     |          |       | 4    |           |           |          |          |
| 15-19 yrs           | 4115312  | 38.79 | 5.44 | 47.86     | 3.59      | 4.50     | 1.35     |
|                     |          |       | 4    |           |           |          |          |
| 20-24 yrs           | 7597992  | 43.40 | 7.47 | 43.12     | 9.01      | 7.17     | 2.54     |
|                     |          |       | 4    |           |           |          |          |
| <b>2012 (total)</b> | 15181533 |       | 6.95 | 42.14     | 7.12      | 5.97     | 2.01     |
|                     |          |       | 4    | n=6398068 | n=1080783 | n=906955 | n=304436 |
| 0-5 yrs             | 817788   | 1.33  | 8.93 | 24.52     | 8.90      | 13.55    | 2.23     |
|                     |          |       | 6    |           |           |          |          |
| 6-9 yrs             | 760909   | 0.81  | 7.59 | 31.09     | 6.74      | 4.47     | 1.63     |
|                     |          |       | 5    |           |           |          |          |
| 10-14 yrs           | 1357488  | 0.69  | 7.21 | 39.82     | 7.26      | 2.35     | 1.77     |
|                     |          |       | 4    |           |           |          |          |

|                     |          |       |       |           |           |          |          |
|---------------------|----------|-------|-------|-----------|-----------|----------|----------|
| 15-19 yrs           | 4224756  | 38.64 | 5.54  | 47.04     | 3.73      | 4.53     | 1.38     |
|                     |          |       | 4     |           |           |          |          |
| 20-24 yrs           | 8020592  | 42.04 | 7.39  | 42.81     | 8.74      | 6.72     | 2.39     |
|                     |          |       | 4     |           |           |          |          |
| <b>2013 (total)</b> | 14211606 |       | 7.05  | 41.61     | 7.46      | 5.65     | 2.12     |
|                     |          |       | 4     | n=5913078 | n=1059433 | n=803194 | n=301142 |
| 0-5 yrs             | 742016   | 1.63  | 9.75  | 24.46     | 11.94     | 18.93    | 3.23     |
|                     |          |       | 6     |           |           |          |          |
| 6-9 yrs             | 707746   | 0.83  | 7.98  | 30.68     | 8.01      | 5.38     | 2.15     |
|                     |          |       | 5     |           |           |          |          |
| 10-14 yrs           | 1275427  | 0.69  | 7.48  | 38.63     | 8.03      | 2.46     | 2.13     |
|                     |          |       | 5     |           |           |          |          |
| 15-19 yrs           | 4016059  | 37.99 | 5.66  | 45.92     | 3.99      | 4.21     | 1.45     |
|                     |          |       | 4     |           |           |          |          |
| 20-24 yrs           | 7470358  | 39.99 | 7.36  | 42.54     | 8.72      | 5.68     | 2.37     |
|                     |          |       | 4     |           |           |          |          |
| <b>2014 (total)</b> | 13162867 |       | 7.21  | 40.52     | 7.96      | 5.95     | 2.32     |
|                     |          |       | 4     | n=5333945 | n=1048343 | n=783350 | n=306004 |
| 0-5 yrs             | 751597   | 2.34  | 11.22 | 23.07     | 17.18     | 29.98    | 5.07     |
|                     |          |       | 6     |           |           |          |          |
| 6-9 yrs             | 639665   | 0.89  | 8.54  | 29.58     | 9.73      | 6.60     | 2.73     |
|                     |          |       | 5     |           |           |          |          |
| 10-14 yrs           | 1171582  | 0.70  | 7.92  | 37.06     | 9.30      | 2.66     | 2.53     |
|                     |          |       | 5     |           |           |          |          |
| 15-19 yrs           | 3717078  | 37.56 | 5.78  | 44.54     | 4.28      | 3.92     | 1.62     |
|                     |          |       | 4     |           |           |          |          |
| 20-24 yrs           | 6882945  | 38.48 | 7.30  | 41.86     | 8.56      | 4.93     | 2.34     |
|                     |          |       | 4     |           |           |          |          |

|                            |          |       |       |               |          |          |          |
|----------------------------|----------|-------|-------|---------------|----------|----------|----------|
| <b>2015</b><br>(total<br>) | 11670555 |       | 7.11  | 40.17         | 7.50     | 5.69     | 2.38     |
|                            |          |       | 4     | n=468812<br>3 | n=904404 | n=664149 | n=278226 |
| 0-5<br>yrs                 | 634319   | 2.12  | 11.58 | 23.25         | 18.72    | 28.01    | 5.58     |
|                            |          |       | 6     |               |          |          |          |
| 6-9<br>yrs                 | 562400   | 0.87  | 8.69  | 29.20         | 10.18    | 6.48     | 2.89     |
|                            |          |       | 5     |               |          |          |          |
| 10-14<br>yrs               | 1038889  | 0.69  | 7.71  | 37.05         | 8.85     | 2.53     | 2.51     |
|                            |          |       | 5     |               |          |          |          |
| 15-19<br>yrs               | 3418316  | 37.36 | 5.80  | 43.00         | 4.20     | 3.91     | 1.67     |
|                            |          |       | 4     |               |          |          |          |
| 20-24<br>yrs               | 6016631  | 37.83 | 7.14  | 41.91         | 8.19     | 4.82     | 2.38     |
|                            |          |       | 4     |               |          |          |          |
|                            |          |       |       |               |          |          |          |
|                            |          |       |       |               |          |          |          |
|                            |          |       |       |               |          |          |          |

|                     |          |       |       |           |          |          |          |
|---------------------|----------|-------|-------|-----------|----------|----------|----------|
| <b>2016 (total)</b> | 10137950 |       | 6.97  | 40.52     | 7.40     | 5.20     | 2.29     |
|                     |          |       | 4     | n=4108311 | n=749800 | n=527468 | n=232186 |
| 0-5 yrs             | 524432   | 1.88  | 11.60 | 23.50     | 18.91    | 25.40    | 5.39     |
|                     |          |       | 6     |           |          |          |          |
| 6-9 yrs             | 493823   | 0.85  | 8.87  | 28.39     | 10.44    | 6.26     | 2.86     |
|                     |          |       | 5     |           |          |          |          |
| 10-14 yrs           | 901470   | 0.67  | 7.46  | 37.34     | 8.21     | 2.25     | 2.32     |
|                     |          |       | 4     |           |          |          |          |
| 15-19 yrs           | 3098725  | 36.83 | 5.77  | 43.19     | 4.19     | 3.66     | 1.67     |
|                     |          |       | 4     |           |          |          |          |
| 20-24 yrs           | 5119500  | 36.98 | 6.96  | 42.39     | 7.72     | 4.49     | 2.29     |
|                     |          |       | 4     |           |          |          |          |
| <b>2017 (total)</b> | 8473713  |       | 6.67  | 42.35     | 6.83     | 4.59     | 2.19     |
|                     |          |       | 4     | n=3588748 | n=578914 | n=388579 | n=185347 |
| 0-5 yrs             | 394655   | 1.68  | 11.47 | 24.88     | 18.95    | 23.39    | 5.26     |
|                     |          |       | 6     |           |          |          |          |
| 6-9 yrs             | 388789   | 0.85  | 8.97  | 28.76     | 11.06    | 6.07     | 2.90     |
|                     |          |       | 5     |           |          |          |          |
| 10-14 yrs           | 747044   | 0.66  | 7.28  | 38.51     | 7.95     | 1.98     | 2.20     |
|                     |          |       | 4     |           |          |          |          |
| 15-19 yrs           | 2719486  | 35.95 | 5.46  | 43.58     | 3.67     | 3.18     | 1.52     |
|                     |          |       | 4     |           |          |          |          |
| 20-24 yrs           | 4223739  | 36.04 | 6.67  | 43.96     | 7.15     | 4.06     | 2.26     |
|                     |          |       | 4     |           |          |          |          |
| <b>2018 (total)</b> | 6705478  |       | 6.24  | 46.68     | 6.42     | 3.68     | 2.11     |
|                     |          |       | 4     | n=3129814 | n=430280 | n=246456 | n=141650 |
| 0-5 yrs             | 288841   | 1.54  | 11.22 | 29.30     | 19.87    | 20.76    | 5.30     |
|                     |          |       | 6     |           |          |          |          |
| 6-9 yrs             | 282695   | 0.89  | 9.19  | 31.32     | 13.09    | 6.61     | 3.26     |
|                     |          |       | 5     |           |          |          |          |
| 10-14 yrs           | 564809   | 0.66  | 7.38  | 41.33     | 9.17     | 1.99     | 2.46     |
|                     |          |       | 4     |           |          |          |          |
| 15-19 yrs           | 2260473  | 33.90 | 5.09  | 50.63     | 3.40     | 2.34     | 1.47     |
|                     |          |       | 3     |           |          |          |          |
| 20-24 yrs           | 3308660  | 34.02 | 6.15  | 47.72     | 6.27     | 3.14     | 2.12     |
|                     |          |       | 4     |           |          |          |          |

<sup>a</sup> Mean MME/day per prescription for persons  $\geq 15$  years old and mean MME/kg/day for persons  $< 15$  years old. Trends not reported for Total strata ( $< 25$  years) as mean MME is not comparable throughout all age groups.

<sup>b</sup> Percent of prescriptions for  $\geq 90$  MME/day for persons  $\geq 15$  years old and the percent of prescriptions for  $> 2$  MME/kg/day for persons  $< 15$  years old.

<sup>c</sup> Percent of prescriptions for extended-release or long-acting opioid formulations.

**eTable 2. Patients < 25 years old dispensed one versus multiple opioid prescriptions, by year, 2006-2018**

|                                                    | Year    |         |         |         |         |         |         |         |         |         |         |         |         |
|----------------------------------------------------|---------|---------|---------|---------|---------|---------|---------|---------|---------|---------|---------|---------|---------|
| Unique patients (counts & proportion) <sup>a</sup> | 2006    | 2007    | 2008    | 2009    | 2010    | 2011    | 2012    | 2013    | 2014    | 2015    | 2016    | 2017    | 2018    |
| <b>Total</b>                                       | 9008235 | 9265660 | 9163826 | 8913473 | 8550526 | 8636028 | 9017890 | 8531810 | 8045410 | 7541857 | 6820891 | 5939791 | 4903521 |
| <b>1 Rx</b>                                        | 6700458 | 6778546 | 6696159 | 6423515 | 6180764 | 6306076 | 6567811 | 6261669 | 5975573 | 5779531 | 5349060 | 4773122 | 4049804 |
|                                                    | 74.4    | 73.2    | 73.1    | 72.1    | 72.3    | 73.0    | 72.8    | 73.4    | 74.3    | 76.6    | 78.4    | 80.4    | 82.6    |
| <b>2-4 Rx</b>                                      | 1957412 | 2090860 | 2069764 | 2080369 | 1985013 | 1961513 | 2069859 | 1923425 | 1756132 | 1518353 | 1282827 | 1028938 | 759996  |
|                                                    | 21.7    | 22.6    | 22.6    | 23.3    | 23.2    | 22.7    | 23.0    | 22.5    | 21.8    | 20.1    | 18.8    | 17.3    | 15.5    |
| <b>5+ Rx</b>                                       | 350365  | 396254  | 397903  | 409589  | 384749  | 368439  | 380220  | 346716  | 313705  | 243973  | 189004  | 137731  | 93721   |
|                                                    | 3.9     | 4.3     | 4.3     | 4.6     | 4.5     | 4.3     | 4.2     | 4.1     | 3.9     | 3.2     | 2.8     | 2.3     | 1.9     |

<sup>a</sup> Proportions may not add up to 100.0 due to rounding.



**eTable 3. Sensitivity Analysis Removing Oncology, Hematology, and Hospice Prescriber Subspecialties**

| Prescribing Characteristic by Year             | Mean or Rate |       | Average Annual Percent Change (AAPC), (95% CI) <sup>a</sup> |                               | Annual Percent Change (APC), (95% CI) & Joinpoint Segments <sup>a</sup> |        |                               |
|------------------------------------------------|--------------|-------|-------------------------------------------------------------|-------------------------------|-------------------------------------------------------------------------|--------|-------------------------------|
|                                                | 2006         | 2018  | 2006-2013                                                   | 2014-2018                     | Trend Years                                                             | APC    | 95% CI                        |
| <b>Opioid Dispensing Rate, per 100 persons</b> |              |       |                                                             |                               |                                                                         |        |                               |
| Total Under 25                                 | 13.23        | 6.28  | -1.10                                                       | -14.49                        | 2006-2012                                                               | 0.44   | (-1.20, 2.11)                 |
|                                                |              |       | (-2.28, 0.10)                                               | (-17.97, -10.86) <sup>b</sup> | 2012-2016                                                               | -9.38  | (-14.12, -5.32) <sup>b</sup>  |
|                                                |              |       |                                                             |                               | 2016-2018                                                               | -18.91 | (-26.45, -10.61) <sup>b</sup> |
| 0-5 yrs                                        | 4.02         | 1.38  | -2.25                                                       | -20.17                        | 2006-2012                                                               | -0.19  | (-2.51, 2.20)                 |
|                                                |              |       | (-3.91, -0.55) <sup>b</sup>                                 | (-24.78, -15.28) <sup>b</sup> | 2012-2016                                                               | -13.75 | (-19.56, -7.52) <sup>b</sup>  |
|                                                |              |       |                                                             |                               | 2016-2018                                                               | -26.12 | (-35.74, -15.07) <sup>b</sup> |
| 6-9 yrs                                        | 3.82         | 1.32  | -3.30                                                       | -17.02                        | 2006-2012                                                               | -2.19  | (-4.10, -0.24) <sup>b</sup>   |
|                                                |              |       | (-4.68, -1.90) <sup>b</sup>                                 | (-21.04, -12.78) <sup>b</sup> | 2012-2016                                                               | -9.68  | (-14.80, -4.25) <sup>b</sup>  |
|                                                |              |       |                                                             |                               | 2016-2018                                                               | -23.76 | (-32.16, -14.32) <sup>b</sup> |
| 10-14 yrs                                      | 5.96         | 2.47  | -1.38                                                       | -16.24                        | 2006-2012                                                               | -0.07  | (-1.38, 1.27)                 |
|                                                |              |       | (-2.33, -0.42) <sup>b</sup>                                 | (-19.00, -13.40) <sup>b</sup> | 2012-2016                                                               | -8.91  | (-12.41, -5.26) <sup>b</sup>  |
|                                                |              |       |                                                             |                               | 2016-2018                                                               | -22.99 | (-28.80, -16.71) <sup>b</sup> |
| 15-19 yrs                                      | 18.31        | 10.31 | -0.61                                                       | -11.27                        | 2006-2013                                                               | -0.61  | (-2.27, 1.08)                 |
|                                                |              |       | (-2.27, 1.08)                                               | (-13.73, -8.74) <sup>b</sup>  | 2013-2018                                                               | -11.27 | (-13.73, -8.74) <sup>b</sup>  |
| 20-24 yrs                                      | 32.26        | 14.96 | -1.01                                                       | -15.05                        | 2006-2012                                                               | 0.72   | (-1.12, 2.60)                 |
|                                                |              |       | (-2.33, 0.33)                                               | (-18.91, -11.01) <sup>b</sup> | 2012-2016                                                               | -10.79 | (-15.53, -5.80) <sup>b</sup>  |
|                                                |              |       |                                                             |                               | 2016-2018                                                               | -19.11 | (-27.47, -9.79) <sup>b</sup>  |
| <b>Mean Amount Opioid Dispensed,</b>           |              |       |                                                             |                               |                                                                         |        |                               |

|                                                 |       |       |                             |                              |              |        |                              |
|-------------------------------------------------|-------|-------|-----------------------------|------------------------------|--------------|--------|------------------------------|
| <b>MME/kg/day or<br/>MME/day<sup>c</sup></b>    |       |       |                             |                              |              |        |                              |
| 0-5 yrs                                         | 1.40  | 1.51  | 1.66                        | -10.38                       | 2006-2011    | -2.38  | (-3.71, -1.04) <sup>b</sup>  |
|                                                 |       |       | (0.12, 3.22) <sup>b</sup>   | (-12.10, -8.64) <sup>b</sup> | 2011-2014    | 12.51  | (5.85, 19.60) <sup>b</sup>   |
|                                                 |       |       |                             |                              | 2014-2018    | -10.38 | (-12.10, -8.64) <sup>b</sup> |
| 6-9 yrs                                         | 0.93  | 0.87  | -2.24                       | -2.24                        | <sup>d</sup> |        |                              |
|                                                 |       |       | (-3.10, -1.38) <sup>b</sup> | (-3.10, -1.38) <sup>b</sup>  |              |        |                              |
| 10-14 yrs                                       | 0.74  | 0.66  | -1.22                       | -1.22                        | <sup>d</sup> |        |                              |
|                                                 |       |       | (-1.43, -1.02) <sup>b</sup> | (-1.43, -1.02) <sup>b</sup>  |              |        |                              |
| 15-19 yrs                                       | 41.11 | 33.77 | -1.16                       | -2.48                        | 2006-2016    | -1.16  | (-1.25, -1.06) <sup>b</sup>  |
|                                                 |       |       | (-1.28, -1.04) <sup>b</sup> | (-3.13, -1.82) <sup>b</sup>  | 2016-2018    | -3.78  | (-5.05, -2.61) <sup>b</sup>  |
| 20-24 yrs                                       | 44.10 | 33.73 | -1.23                       | -3.16                        | 2006-2010    | 0.24   | (-0.93, 1.41)                |
|                                                 |       |       | (-1.81, -0.65) <sup>b</sup> | (-3.55, -2.77) <sup>b</sup>  | 2010-2018    | -3.16  | (-3.55, -2.77) <sup>b</sup>  |
| <b>Mean Duration per<br/>Prescription, days</b> |       |       |                             |                              |              |        |                              |
| Total Under 25                                  | 6.09  | 6.10  | 1.72                        | -3.25                        | 2006-2015    | 1.72   | (1.37, 2.07) <sup>b</sup>    |
|                                                 |       |       | (1.37, 2.07) <sup>b</sup>   | (-4.40, -2.09) <sup>b</sup>  | 2015-2018    | -4.86  | (-3.06, -6.13) <sup>b</sup>  |
| 0-5 yrs                                         | 8.12  | 11.21 | 2.25                        | 0.54                         | 2006-2011    | 0.50   | (-0.37, 1.38)                |
|                                                 |       |       | (1.60, 2.90) <sup>b</sup>   | (-0.63, 1.73)                | 2011-2015    | 6.75   | (4.69, 8.84) <sup>b</sup>    |
|                                                 |       |       |                             |                              | 2015-2018    | -1.45  | (-3.35, 0.49)                |
| 6-9 yrs                                         | 7.23  | 8.87  | 0.42                        | 0.42                         | <sup>d</sup> |        |                              |
|                                                 |       |       | (-0.32, 1.16)               | (-0.32, 1.16)                |              |        |                              |
| 10-14 yrs                                       | 5.84  | 6.92  | 2.34                        | -1.53                        | 2006-2010    | 0.84   | (-0.74, 2.44)                |
|                                                 |       |       | (1.26, 3.44) <sup>b</sup>   | (-3.07, 0.03)                | 2010-2014    | 4.39   | (1.82, 7.03) <sup>b</sup>    |
|                                                 |       |       |                             |                              | 2014-2018    | -1.53  | (-3.07, 0.03)                |
| 15-19 yrs                                       | 5.07  | 4.98  | 1.09                        | -3.04                        | 2006-2016    | 1.09   | (0.85, 1.33) <sup>b</sup>    |

|                                                                           |       |       |                             |                             |              |       |                             |
|---------------------------------------------------------------------------|-------|-------|-----------------------------|-----------------------------|--------------|-------|-----------------------------|
|                                                                           |       |       | (0.85, 1.33) <sup>b</sup>   | (-4.30, -1.76) <sup>b</sup> | 2016-2018    | -7.00 | (-9.81, -4.10) <sup>b</sup> |
|                                                                           |       |       |                             |                             |              |       |                             |
| 20-24 yrs                                                                 | 6.30  | 6.09  | 1.99                        | -4.50                       | 2006-2010    | 4.04  | (2.03, 6.08) <sup>b</sup>   |
|                                                                           |       |       | (0.92, 3.08) <sup>b</sup>   | (-6.20, -2.77) <sup>b</sup> | 2010-2016    | -0.67 | (-2.58, 1.28)               |
|                                                                           |       |       |                             |                             | 2016-2018    | -5.75 | (-8.60, -2.81) <sup>b</sup> |
| <b>Prescription by Duration, rate per 100 persons dispensed an opioid</b> |       |       |                             |                             |              |       |                             |
| ≤ 3 days                                                                  |       |       |                             |                             |              |       |                             |
| Total Under 25                                                            | 75.48 | 64.18 | -1.48                       | -1.48                       | <sup>d</sup> |       |                             |
|                                                                           |       |       | (-2.05, -0.91) <sup>b</sup> | (-2.05, -0.91) <sup>b</sup> |              |       |                             |
| 0-5 yrs                                                                   | 35.06 | 45.22 | 0.01                        | 0.01                        | <sup>d</sup> |       |                             |
|                                                                           |       |       | (-1.24, 1.27)               | (-1.24, 1.27)               |              |       |                             |
| 6-9 yrs                                                                   | 46.55 | 43.11 | -1.65                       | -1.65                       | <sup>d</sup> |       |                             |
|                                                                           |       |       | (-2.43, -0.86) <sup>b</sup> | (-2.43, -0.86) <sup>b</sup> |              |       |                             |
| 10-14 yrs                                                                 | 64.54 | 55.13 | -2.58                       | 0.61                        | 2006-2016    | -2.51 | (-2.79, -2.24) <sup>b</sup> |
|                                                                           |       |       | (-3.19, -1.96) <sup>b</sup> | (-2.80, 4.15)               | 2016-2018    | 4.32  | (0.56, 8.22) <sup>b</sup>   |
| 15-19 yrs                                                                 | 77.65 | 63.73 | -1.76                       | -1.76                       | <sup>d</sup> |       |                             |
|                                                                           |       |       | (-2.45, -1.07) <sup>b</sup> | (-2.45, -1.07) <sup>b</sup> |              |       |                             |
| 20-24 yrs                                                                 | 88.33 | 69.50 | -1.75                       | -1.75                       | <sup>d</sup> |       |                             |
|                                                                           |       |       | (-2.37, -1.13) <sup>b</sup> | (-2.37, -1.13) <sup>b</sup> |              |       |                             |
|                                                                           |       |       |                             |                             |              |       |                             |
| ≥ 30 days                                                                 |       |       |                             |                             |              |       |                             |

|                                                                                       |       |       |                             |                               |           |        |                               |
|---------------------------------------------------------------------------------------|-------|-------|-----------------------------|-------------------------------|-----------|--------|-------------------------------|
| Total Under 25                                                                        | 8.01  | 8.35  | 5.86                        | -9.99                         | 2006-2008 | 13.07  | (7.08, 18.51) <sup>b</sup>    |
|                                                                                       |       |       | (4.63, 7.11) <sup>b</sup>   | (-11.32, -8.64) <sup>b</sup>  | 2008-2014 | 3.11   | (2.03, 4.20)                  |
|                                                                                       |       |       |                             |                               | 2014-2018 | -9.99  | (-11.32, -8.64) <sup>b</sup>  |
| 0-5 yrs                                                                               | 9.40  | 30.83 | 8.10                        | 1.73                          | 2006-2011 | -0.65  | (-3.21, 1.98)                 |
|                                                                                       |       |       | (5.00, 11.30) <sup>b</sup>  | (-1.95, 5.56)                 | 2011-2014 | 33.49  | (18.78, 50.02) <sup>b</sup>   |
|                                                                                       |       |       |                             |                               | 2014-2018 | 1.73   | (-1.95, 5.56)                 |
| 6-9 yrs                                                                               | 8.88  | 16.77 | -1.03                       | 8.13                          | 2006-2011 | -4.47  | (-11.15, 2.71)                |
|                                                                                       |       |       | (-5.41, 3.55)               | (3.55, 12.92) <sup>b</sup>    | 2011-2018 | 8.13   | (3.55, 12.92) <sup>b</sup>    |
| 10-14 yrs                                                                             | 6.28  | 10.53 | 5.72                        | -2.69                         | 2006-2010 | 0.45   | (-6.96, 8.45)                 |
|                                                                                       |       |       | (0.39, 11.34) <sup>b</sup>  | (-9.87, 5.06)                 | 2010-2014 | 13.18  | (0.27, 27.76) <sup>b</sup>    |
|                                                                                       |       |       |                             |                               | 2014-2018 | -2.69  | (-9.87, 5.06)                 |
| 15-19 yrs                                                                             | 4.40  | 3.97  | 2.94                        | -10.27                        | 2006-2013 | 2.94   | (1.11, 4.80) <sup>b</sup>     |
|                                                                                       |       |       | (1.11, 4.80) <sup>b</sup>   | (-12.92, -7.54) <sup>b</sup>  | 2013-2018 | -10.27 | (-12.92, -7.54) <sup>b</sup>  |
| 20-24 yrs                                                                             | 10.72 | 8.92  | 6.41                        | -12.86                        | 2006-2009 | 17.23  | (11.07, 23.74) <sup>b</sup>   |
|                                                                                       |       |       | (3.98, 8.91) <sup>b</sup>   | (-15.69, -9.83) <sup>b</sup>  | 2009-2014 | -1.04  | (-4.37, 2.40)                 |
|                                                                                       |       |       |                             |                               | 2014-2018 | -12.86 | (-15.79, -9.83) <sup>b</sup>  |
| <b>High-dosage Prescription, rate per 100 persons dispensed an opioid<sup>e</sup></b> |       |       |                             |                               |           |        |                               |
| Total Under 25                                                                        | 8.77  | 3.66  | -1.71                       | -14.06                        | 2006-2010 | 2.57   | (-0.70, 5.94)                 |
|                                                                                       |       |       | (-3.27, -0.13) <sup>b</sup> | (-17.43, -10.56) <sup>b</sup> | 2010-2016 | -7.14  | (-9.25, -4.99) <sup>b</sup>   |
|                                                                                       |       |       |                             |                               | 2016-2018 | -20.47 | (-28.21, -11.89) <sup>b</sup> |
|                                                                                       |       |       |                             |                               |           |        |                               |
|                                                                                       |       |       |                             |                               |           |        |                               |
|                                                                                       |       |       |                             |                               |           |        |                               |

|                                                                                                 |       |       |                             |                               |              |        |                               |
|-------------------------------------------------------------------------------------------------|-------|-------|-----------------------------|-------------------------------|--------------|--------|-------------------------------|
| 0-5 yrs                                                                                         | 21.36 | 31.67 | 3.06                        | -10.76                        | 2006-2011    | -7.14  | (-9.38, -4.84) <sup>b</sup>   |
|                                                                                                 |       |       | (0.29, 5.90) <sup>b</sup>   | (-13.79, -7.63) <sup>b</sup>  | 2011-2014    | 33.72  | (19.89, 49.15) <sup>b</sup>   |
|                                                                                                 |       |       |                             |                               | 2014-2018    | -10.76 | (-13.79, -7.63) <sup>b</sup>  |
| 6-9 yrs                                                                                         | 9.64  | 8.71  | -6.04                       | -1.22                         | 2006-2011    | -12.72 | (-17.81, -7.32) <sup>b</sup>  |
|                                                                                                 |       |       | (-12.13, 0.47)              | (-9.26, 7.53)                 | 2011-2014    | 12.99  | (-13.61, 47.79)               |
|                                                                                                 |       |       |                             |                               | 2014-2018    | -1.22  | (-9.26, 7.53)                 |
| 10-14 yrs                                                                                       | 3.63  | 2.52  | -4.67                       | -9.55                         | 2006-2009    | -5.78  | (-12.27, 1.18)                |
|                                                                                                 |       |       | (-4.62, 1.37)               | (-13.54, -5.26) <sup>b</sup>  | 2009-2014    | 1.53   | (-2.94, 6.22)                 |
|                                                                                                 |       |       |                             |                               | 2014-2018    | -9.55  | (-13.54, -5.38) <sup>b</sup>  |
| 15-19 yrs                                                                                       | 7.77  | 2.81  | -3.36                       | -14.30                        | 2006-2016    | -3.36  | (-4.32, -2.38) <sup>b</sup>   |
|                                                                                                 |       |       | (-4.32, -2.38) <sup>b</sup> | (-18.88, -9.47) <sup>b</sup>  | 2016-2018    | -24.01 | (-33.19, -13.56) <sup>b</sup> |
| 20-24 yrs                                                                                       | 12.52 | 4.29  | -2.65                       | -15.35                        | 2006-2011    | 2.95   | (-1.09, 7.16)                 |
|                                                                                                 |       |       | (-5.05, -0.19) <sup>b</sup> | (-17.36, -13.30) <sup>b</sup> | 2011-2018    | -15.35 | (-17.36, -13.30) <sup>b</sup> |
| <b>Prescription for ER/LA Formulation, rate per 100 persons dispensed an opioid<sup>f</sup></b> |       |       |                             |                               |              |        |                               |
| Total Under 25                                                                                  | 2.21  | 2.54  | 4.58                        | -7.21                         | 2006-2008    | 23.38  | (4.84, 45.18) <sup>b</sup>    |
|                                                                                                 |       |       | (0.64, 8.69) <sup>b</sup>   | (-11.46, -2.77) <sup>b</sup>  | 2008-2015    | -2.10  | (-4.76, 0.63)                 |
|                                                                                                 |       |       |                             |                               | 2015-2018    | -8.86  | (-15.98, -1.13) <sup>b</sup>  |
| 0-5 yrs                                                                                         | 2.27  | 7.88  | 7.84                        | -0.42                         | 2006-2011    | -0.08  | (-4.03, 4.03)                 |
|                                                                                                 |       |       | (3.10, 12.81) <sup>b</sup>  | (-5.94, 5.42)                 | 2011-2014    | 30.53  | (8.99, 56.32) <sup>b</sup>    |
|                                                                                                 |       |       |                             |                               | 2014-2018    | -0.42  | (-5.94, 5.42)                 |
| 6-9 yrs                                                                                         | 2.01  | 4.18  | 0.21                        | 0.21                          | <sup>d</sup> |        |                               |
|                                                                                                 |       |       | (-2.69, 3.20)               | (-2.69, 3.20)                 |              |        |                               |
| 10-14 yrs                                                                                       | 1.49  | 2.87  | 6.36                        | -4.09                         | 2006-2014    | 6.36   | (3.41, 9.40) <sup>b</sup>     |
|                                                                                                 |       |       | (3.41, 9.40) <sup>b</sup>   | (-11.60, 4.06)                | 2014-2018    | -4.09  | (-11.60, 4.06)                |

|           |      |      |                           |                             |           |        |                             |
|-----------|------|------|---------------------------|-----------------------------|-----------|--------|-----------------------------|
|           |      |      |                           |                             |           |        |                             |
| 15-19 yrs | 1.34 | 1.52 | 3.96                      | -7.10                       | 2006-2008 | 20.23  | (-0.89, 45.86)              |
|           |      |      | (-0.55, 8.68)             | (-13.75, 0.07)              | 2008-2016 | -1.91  | (-4.41, 0.65)               |
|           |      |      |                           |                             | 2016-2018 | -12.01 | (-27.47, 6.74)              |
| 20-24 yrs | 3.06 | 2.72 | 2.92                      | -8.08                       | 2006-2013 | 19.65  | (11.31, 28.61) <sup>b</sup> |
|           |      |      | (0.17, 5.74) <sup>b</sup> | (-9.28, -6.86) <sup>b</sup> | 2013-2018 | -8.08  | (-9.28, -6.86) <sup>b</sup> |

<sup>a</sup>Joinpoint allowed up to 2 joinpoints. Due to retail channel data coverage, 2014 was added as a jump point.

<sup>b</sup>Indicates that APC and AAPC is statistically significant ( $P < 0.05$ ) using a 2-sided test based on the permutation methods.

<sup>c</sup>Mean MME/day per prescription for persons  $\geq 15$  years old and mean MME/kg/day for persons  $< 15$  years old. Trends not reported for Total strata ( $< 25$  years) as mean MME is not comparable throughout all age groups.

<sup>d</sup>No joinpoint detected for this strata and outcome. APC is constant and equal to AAPC.

<sup>e</sup>Prescription for  $\geq 90$  MME/day for persons  $\geq 15$  years old and prescription for  $> 2$  MME/kg/day for persons  $< 15$  years old.

<sup>f</sup>Prescriptions for extended-release or long-acting opioid formulations

**eTable 4. Sensitivity Analysis Removing Long-Duration and High-Dosage Prescriptions**

| Prescribing Characteristic by Year                                     | Mean or Rate |       | Average Annual Percent Change (AAPC), (95% CI) <sup>a</sup> |                                         | Annual Percent Change (APC), (95% CI) & Joinpoint Segments <sup>a</sup> |                           |                                                                                              |
|------------------------------------------------------------------------|--------------|-------|-------------------------------------------------------------|-----------------------------------------|-------------------------------------------------------------------------|---------------------------|----------------------------------------------------------------------------------------------|
|                                                                        | 2006         | 2018  | 2006-2013                                                   | 2014-2018                               | Trend Years                                                             | APC                       | 95% CI                                                                                       |
| <b>Opioid Dispensing Rate, per 100 persons</b>                         |              |       |                                                             |                                         |                                                                         |                           |                                                                                              |
| Total Under 25                                                         | 14.00        | 6.37  | -0.98<br>(-2.46, 0.53)                                      | -15.04<br>(-17.15, -12.87) <sup>b</sup> | 2006-2013<br>2013-2018                                                  | -0.98<br>-15.04           | (-2.46, 0.53)<br>(-17.15, -12.87) <sup>b</sup>                                               |
| 0-5 yrs                                                                | 4.34         | 1.33  | -2.31<br>(-3.56, -1.03) <sup>b</sup>                        | -20.95<br>(-24.97, -16.71) <sup>b</sup> | 2006-2013<br>2013-2016<br>2016-2018                                     | -2.31<br>-16.62<br>-25.05 | (-3.56, -1.03) <sup>b</sup><br>(-24.33, -8.14) <sup>b</sup><br>(-31.97, -17.42) <sup>b</sup> |
| 6-9 yrs                                                                | 4.14         | 1.38  | -3.50<br>(-4.64, -2.34) <sup>b</sup>                        | -16.40<br>(-19.81, -12.84) <sup>b</sup> | 2006-2015<br>2015-2018                                                  | -3.50<br>-20.30           | (-4.64, -2.34) <sup>b</sup><br>(-25.34, -14.93) <sup>b</sup>                                 |
| 10-14 yrs                                                              | 6.48         | 2.61  | -1.10<br>(-2.31, 0.13)                                      | -17.00<br>(-21.03, -12.77) <sup>b</sup> | 2006-2013<br>2013-2016<br>2016-2018                                     | -1.10<br>-11.44<br>-22.22 | (-2.31, 0.13)<br>(-19.24, -2.89) <sup>b</sup><br>(-29.07, -14.70) <sup>b</sup>               |
| 15-19 yrs                                                              | 19.62        | 10.49 | -1.39<br>(-2.54, -0.24) <sup>b</sup>                        | -10.71<br>(-14.27, -7.01) <sup>b</sup>  | 2006-2015<br>2015-2018                                                  | -1.39<br>-13.62           | (-2.53, -0.24) <sup>b</sup><br>(-18.95, -7.94) <sup>b</sup>                                  |
| 20-24 yrs                                                              | 34.28        | 15.13 | -0.95<br>(-2.14, 0.25)                                      | -15.57<br>(-18.47, -12.57) <sup>b</sup> | 2006-2014<br>2014-2018                                                  | -0.95<br>-15.57           | (-2.14, 0.25)<br>(-18.47, -12.57) <sup>b</sup>                                               |
| <b>Mean Amount Opioid Dispensed, MME/kg/day or MME/day<sup>c</sup></b> |              |       |                                                             |                                         |                                                                         |                           |                                                                                              |

|                                                         |       |       |                             |                              |              |       |                              |
|---------------------------------------------------------|-------|-------|-----------------------------|------------------------------|--------------|-------|------------------------------|
| 0-5 yrs                                                 | 1.23  | 1.19  | 0.42                        | -9.99                        | 2006-2011    | -2.96 | (-5.27, -0.59) <sup>b</sup>  |
|                                                         |       |       | (-2.25, 3.16)               | (-13.01, -6.87) <sup>b</sup> | 2011-2014    | 9.38  | (-1.81, 21.84)               |
|                                                         |       |       |                             |                              | 2014-2018    | -9.99 | (-13.01, -6.87) <sup>b</sup> |
| 6-9 yrs                                                 | 0.88  | 0.79  | -2.76                       | -2.76                        |              |       |                              |
|                                                         |       |       | (-3.62, -1.89) <sup>b</sup> | (-3.62, -1.89) <sup>b</sup>  | <sup>d</sup> |       |                              |
| 10-14 yrs                                               | 0.72  | 0.63  | -1.36                       | -1.36                        |              |       |                              |
|                                                         |       |       | (-1.50, -1.22) <sup>b</sup> | (-1.50, -1.22) <sup>b</sup>  | <sup>d</sup> |       |                              |
| 15-19 yrs                                               | 40.71 | 33.53 | -1.17                       | -2.37                        | 2006-2016    | -1.17 | (-1.25, -1.08) <sup>b</sup>  |
|                                                         |       |       | (-1.25, -1.08) <sup>b</sup> | (-2.85, -1.90) <sup>b</sup>  | 2016-2018    | -3.57 | (-4.66, -2.46) <sup>b</sup>  |
| 20-24 yrs                                               | 42.33 | 33.35 | -1.23                       | -2.64                        | 2006-2010    | -0.16 | (-1.17, 0.85)                |
|                                                         |       |       | (-1.73, -0.73) <sup>b</sup> | (-2.98, -2.30) <sup>b</sup>  | 2010-2018    | -2.64 | (-2.98, -2.30) <sup>b</sup>  |
| <b>Mean Duration<br/>per<br/>Prescription,<br/>days</b> |       |       |                             |                              |              |       |                              |
| Total Under 25                                          | 5.87  | 5.99  | 1.87                        | -2.85                        | 2006-2015    | 1.87  | (1.37, 2.07) <sup>b</sup>    |
|                                                         |       |       | (1.58, 2.16) <sup>b</sup>   | (-3.81, -1.88) <sup>b</sup>  | 2015-2018    | -4.38 | (-3.06, -6.13) <sup>b</sup>  |
| 0-5 yrs                                                 | 7.39  | 9.21  | 1.79                        | 0.69                         | 2006-2011    | 0.95  | (0.12, 1.78) <sup>b</sup>    |
|                                                         |       |       | (1.18, 2.40) <sup>b</sup>   | (-0.42, 1.81)                | 2011-2015    | 3.94  | (2.05, 5.86) <sup>b</sup>    |
|                                                         |       |       |                             |                              | 2015-2018    | -0.37 | (-2.19, 1.47)                |
| 6-9 yrs                                                 | 6.87  | 8.50  | 0.81                        | 0.81                         | <sup>d</sup> |       |                              |
|                                                         |       |       | (0.32, 1.31) <sup>b</sup>   | (0.32, 1.31) <sup>b</sup>    |              |       |                              |
|                                                         |       |       |                             |                              |              |       |                              |



|                                                                           |       |       |                                      |                                      |              |       |                             |
|---------------------------------------------------------------------------|-------|-------|--------------------------------------|--------------------------------------|--------------|-------|-----------------------------|
| 10-14 yrs                                                                 | 5.72  | 7.16  | 3.37<br>(2.32, 4.42) <sup>b</sup>    | -1.82<br>(-3.28, -0.33) <sup>b</sup> | 2006-2009    | 1.41  | (-0.97, 3.84)               |
|                                                                           |       |       |                                      |                                      | 2009-2014    | 4.86  | (3.30, 6.45) <sup>b</sup>   |
|                                                                           |       |       |                                      |                                      | 2014-2018    | -1.82 | (-3.28, -0.33) <sup>b</sup> |
| 15-19 yrs                                                                 | 5.00  | 5.00  | 0.38<br>(-4.26, 3.66)                | 0.38<br>(-4.26, 3.66)                | <sup>d</sup> |       |                             |
| 20-24 yrs                                                                 | 6.08  | 6.00  | 2.20<br>(1.56, 2.84) <sup>b</sup>    | -3.48<br>(-4.40, -2.56) <sup>b</sup> | 2006-2010    | 4.34  | (2.63, 6.07) <sup>b</sup>   |
|                                                                           |       |       |                                      |                                      | 2010-2016    | 0.63  | (-0.11, 1.37)               |
|                                                                           |       |       |                                      |                                      | 2016-2018    | -4.82 | (-6.38, -3.23) <sup>b</sup> |
| <b>Prescription by Duration, rate per 100 persons dispensed an opioid</b> |       |       |                                      |                                      |              |       |                             |
| ≤ 3 days                                                                  |       |       |                                      |                                      |              |       |                             |
| Total Under 25                                                            | 77.31 | 63.94 | -1.49<br>(-1.97, -1.01) <sup>b</sup> | -1.07<br>(-2.99, 0.89)               | 2006-2013    | -1.49 | (-1.97, -1.01) <sup>b</sup> |
|                                                                           |       |       |                                      |                                      | 2013-2016    | -5.10 | (-8.49, -1.59) <sup>b</sup> |
|                                                                           |       |       |                                      |                                      | 2016-2018    | 3.14  | (-0.54, 6.95)               |
| 0-5 yrs                                                                   | 38.08 | 45.46 | -1.12<br>(-3.04, 0.84)               | 4.36<br>(2.42, 6.34) <sup>b</sup>    | 2006-2011    | -3.23 | (-6.22, -0.14) <sup>b</sup> |
|                                                                           |       |       |                                      |                                      | 2011-2018    | 4.36  | (2.42, 6.34)                |
| 6-9 yrs                                                                   | 48.37 | 42.86 | -1.73<br>(-2.44, -1.01) <sup>b</sup> | -1.73<br>(-2.44, -1.01) <sup>b</sup> | <sup>d</sup> |       |                             |
| 10-14 yrs                                                                 | 66.07 | 54.41 | -2.66<br>(-2.92, -2.41) <sup>b</sup> | 0.79<br>(-0.66, 2.26)                | 2006-2016    | -2.66 | (-2.92, -2.41) <sup>b</sup> |
|                                                                           |       |       |                                      |                                      | 2016-2018    | 4.29  | (0.87, 7.98) <sup>b</sup>   |
| 15-19 yrs                                                                 | 79.27 | 63.55 | -2.15<br>(-2.57, -1.74) <sup>b</sup> | -0.53<br>(-1.98, 0.95) <sup>b</sup>  | 2006-2012    | -1.60 | (-2.17, -1.02) <sup>b</sup> |
|                                                                           |       |       |                                      |                                      | 2012-2016    | -5.42 | (-7.04, -3.77) <sup>b</sup> |
|                                                                           |       |       |                                      |                                      | 2016-2018    | 4.62  | (1.07, 8.30) <sup>b</sup>   |
| 20-24 yrs                                                                 | 90.48 | 69.46 | -1.33<br>(-2.77, 0.13)               | -2.62<br>(-3.31, -1.92) <sup>b</sup> | 2006-2009    | 0.42  | (-3.45, 4.44)               |
|                                                                           |       |       |                                      |                                      | 2009-2018    | -2.62 | (-3.31, -1.92) <sup>b</sup> |

|                                                                                       |       |       |                             |                               |           |        |                               |
|---------------------------------------------------------------------------------------|-------|-------|-----------------------------|-------------------------------|-----------|--------|-------------------------------|
| ≥ 30 days                                                                             |       |       |                             |                               |           |        |                               |
| Total Under 25                                                                        | 6.72  | 7.36  | 6.19                        | -8.86                         | 2006-2009 | 11.94  | (8.74, 15.24) <sup>b</sup>    |
|                                                                                       |       |       | (5.34, 7.05) <sup>b</sup>   | (-9.45, -8.27) <sup>b</sup>   | 2009-2018 | 3.97   | (3.02, 4.93) <sup>b</sup>     |
| 0-5 yrs                                                                               | 5.43  | 15.95 | 6.36                        | 7.67                          | 2006-2011 | -0.83  | (-4.91, 3.42)                 |
|                                                                                       |       |       | (1.49, 11.47) <sup>b</sup>  | (1.46, 14.25) <sup>b</sup>    | 2011-2014 | 26.72  | (5.03, 52.89) <sup>b</sup>    |
|                                                                                       |       |       |                             |                               | 2014-2018 | 7.67   | (1.46, 14.25) <sup>b</sup>    |
| 6-9 yrs                                                                               | 6.84  | 13.53 | -0.11                       | 8.23                          | 2006-2011 | -3.26  | (-8.72, 2.53)                 |
|                                                                                       |       |       | (-5.67, 3.58)               | (4.53, 12.06) <sup>b</sup>    | 2011-2018 | 8.23   | (4.53, 12.06) <sup>b</sup>    |
| 10-14 yrs                                                                             | 5.55  | 10.81 | 8.54                        | -2.70                         | 2006-2014 | 8.54   | (5.31, 11.87) <sup>b</sup>    |
|                                                                                       |       |       | (5.31, 11.87) <sup>b</sup>  | (-10.86, 6.20)                | 2014-2018 | -2.70  | (-10.86, 6.20)                |
| 15-19 yrs                                                                             | 4.53  | 4.26  | 2.95                        | -9.20                         | 2006-2014 | 2.95   | (1.58, 4.35) <sup>b</sup>     |
|                                                                                       |       |       | (1.58, 4.35) <sup>b</sup>   | (-12.67, -5.58) <sup>b</sup>  | 2014-2018 | -9.20  | (-12.67, -5.58) <sup>b</sup>  |
| 20-24 yrs                                                                             | 9.27  | 8.24  | 6.46                        | -12.02                        | 2006-2009 | 14.94  | (8.49, 21.77) <sup>b</sup>    |
|                                                                                       |       |       | (3.16, 9.86) <sup>b</sup>   | (-14.26, -9.72) <sup>b</sup>  | 2009-2013 | 0.51   | (-5.31, 6.48)                 |
|                                                                                       |       |       |                             |                               | 2013-2018 | -12.02 | (-14.26, -9.72) <sup>b</sup>  |
| <b>High-dosage Prescription, rate per 100 persons dispensed an opioid<sup>e</sup></b> |       |       |                             |                               |           |        |                               |
| Total Under 25                                                                        | 9.55  | 3.63  | -3.27                       | -14.89                        | 2006-2015 | -3.27  | (-4.03, 2.51)                 |
|                                                                                       |       |       | (-4.03, -2.51) <sup>b</sup> | (-17.20, -12.52) <sup>b</sup> | 2015-2018 | -18.45 | (-21.88, -14.86) <sup>b</sup> |
| 0-5 yrs                                                                               | 17.28 | 17.38 | 0.74                        | -14.35                        | 2006-2011 | -9.04  | (-11.79, -6.20) <sup>b</sup>  |
|                                                                                       |       |       | (-2.66, 4.25)               | (-17.99, -10.54) <sup>b</sup> | 2011-2014 | 30.04  | (13.35, 49.19) <sup>b</sup>   |
|                                                                                       |       |       |                             |                               | 2014-2018 | -14.35 | (-17.99, -10.54) <sup>b</sup> |

|                                                                                                 |       |      |                              |                               |              |        |                               |
|-------------------------------------------------------------------------------------------------|-------|------|------------------------------|-------------------------------|--------------|--------|-------------------------------|
| 6-9 yrs                                                                                         | 7.78  | 4.64 | -10.50                       | -1.95                         | 2006-2011    | -13.70 | (-20.55, -7.26) <sup>b</sup>  |
|                                                                                                 |       |      | (-15.00, -5.76) <sup>b</sup> | (-6.67, 3.02)                 | 2011-2018    | 1.95   | (-6.67, 3.02)                 |
| 10-14 yrs                                                                                       | 2.99  | 1.40 | -4.46                        | -12.37                        | 2006-2009    | -7.84  | (-12.18, -3.29) <sup>b</sup>  |
|                                                                                                 |       |      | (-4.41, -2.47) <sup>b</sup>  | (-15.00, -9.66) <sup>b</sup>  | 2009-2014    | 1.84   | (-4.79, 1.20)                 |
|                                                                                                 |       |      |                              |                               | 2014-2018    | -12.37 | (-15.00, -9.66) <sup>b</sup>  |
| 15-19 yrs                                                                                       | 7.61  | 2.52 | -3.88                        | -14.76                        | 2006-2016    | -3.88  | (-4.86, -2.88) <sup>b</sup>   |
|                                                                                                 |       |      | (-4.86, -2.88) <sup>b</sup>  | (-19.43, -9.82) <sup>b</sup>  | 2016-2018    | -24.41 | (-33.77, -13.74) <sup>b</sup> |
| 20-24 yrs                                                                                       | 11.55 | 3.69 | -3.65                        | -15.27                        | 2006-2012    | -1.56  | (-4.66, -1.64) <sup>b</sup>   |
|                                                                                                 |       |      | (-5.90, -1.35) <sup>b</sup>  | (-17.94, -12.52) <sup>b</sup> | 2012-2018    | -15.27 | (-17.94, -12.52) <sup>b</sup> |
| <b>Prescription for ER/LA Formulation, rate per 100 persons dispensed an opioid<sup>f</sup></b> |       |      |                              |                               |              |        |                               |
| Total Under 25                                                                                  | 1.72  | 2.25 | 5.22                         | -4.78                         | 2006-2008    | 21.05  | (6.39, 37.73) <sup>b</sup>    |
|                                                                                                 |       |      | (2.06, 8.49) <sup>b</sup>    | (-8.25, -1.17) <sup>b</sup>   | 2008-2015    | -0.51  | (-2.66, 1.68)                 |
|                                                                                                 |       |      |                              |                               | 2015-2018    | -6.16  | (-12.02, 0.10)                |
| 0-5 yrs                                                                                         | 1.14  | 4.29 | 5.83                         | 5.43                          | <sup>d</sup> |        |                               |
|                                                                                                 |       |      | (1.43, 9.58) <sup>b</sup>    | (1.43, 9.58) <sup>b</sup>     |              |        |                               |
| 6-9 yrs                                                                                         | 1.07  | 2.77 | 1.47                         | 1.47                          | <sup>d</sup> |        |                               |
|                                                                                                 |       |      | (-1.65, 4.70)                | (-1.65, 4.70)                 |              |        |                               |
| 10-14 yrs                                                                                       | 1.12  | 2.51 | 5.35                         | 5.35                          | <sup>d</sup> |        |                               |
|                                                                                                 |       |      | (3.60, 7.13) <sup>b</sup>    | (3.60, 7.13) <sup>b</sup>     |              |        |                               |
| 15-19 yrs                                                                                       | 1.20  | 1.48 | 4.34                         | -5.35                         | 2006-2008    | 18.21  | (-1.80, 42.29)                |
|                                                                                                 |       |      | (-0.01, 8.88)                | (-11.86, 1.65)                | 2008-2016    | -0.74  | (-0.74, 1.75)                 |
|                                                                                                 |       |      |                              |                               | 2016-2018    | -9.74  | (-25.01, 8.66)                |

|           |      |      |                           |                             |           |       |                             |
|-----------|------|------|---------------------------|-----------------------------|-----------|-------|-----------------------------|
| 20-24 yrs | 2.47 | 2.59 | 3.70                      | -5.56                       | 2006-2009 | 17.47 | (9.29, 26.27) <sup>b</sup>  |
|           |      |      | (0.93, 6.55) <sup>b</sup> | (-6.79, -4.30) <sup>b</sup> | 2009-2018 | -5.56 | (-6.79, -4.30) <sup>b</sup> |

<sup>a</sup>Joinpoint allowed up to 2 joinpoints. Due to retail channel data coverage, 2014 was added as a jump point.

<sup>b</sup>Indicates that APC and AAPC is statistically significant ( $P < 0.05$ ) using a 2-sided test based on the permutation methods.

<sup>c</sup>Mean MME/day per prescription for persons  $\geq 15$  years old and mean MME/kg/day for persons  $< 15$  years old. Trends not reported for Total strata ( $< 25$  years) as mean MME is not comparable throughout all age groups.

<sup>d</sup>No joinpoint detected for this strata and outcome. APC is constant and equal to AAPC.

<sup>e</sup>Prescription for  $\geq 90$  MME/day for persons  $\geq 15$  years old and prescription for  $> 2$  MME/kg/day for persons  $< 15$  years old.

<sup>f</sup>Prescriptions for extended-release or long-acting opioid formulations.
